# Supplementary material for: Structure of histone deacetylase complex Rpd3S bound to nucleosome
Source: Research Square preprint supplement (doi:10.21203/rs.3.rs-2374304/v1), 2023-05-02
Supplement: Supplementary file 1 [file 64c5b730f00c8e2925dc198f.docx]

**
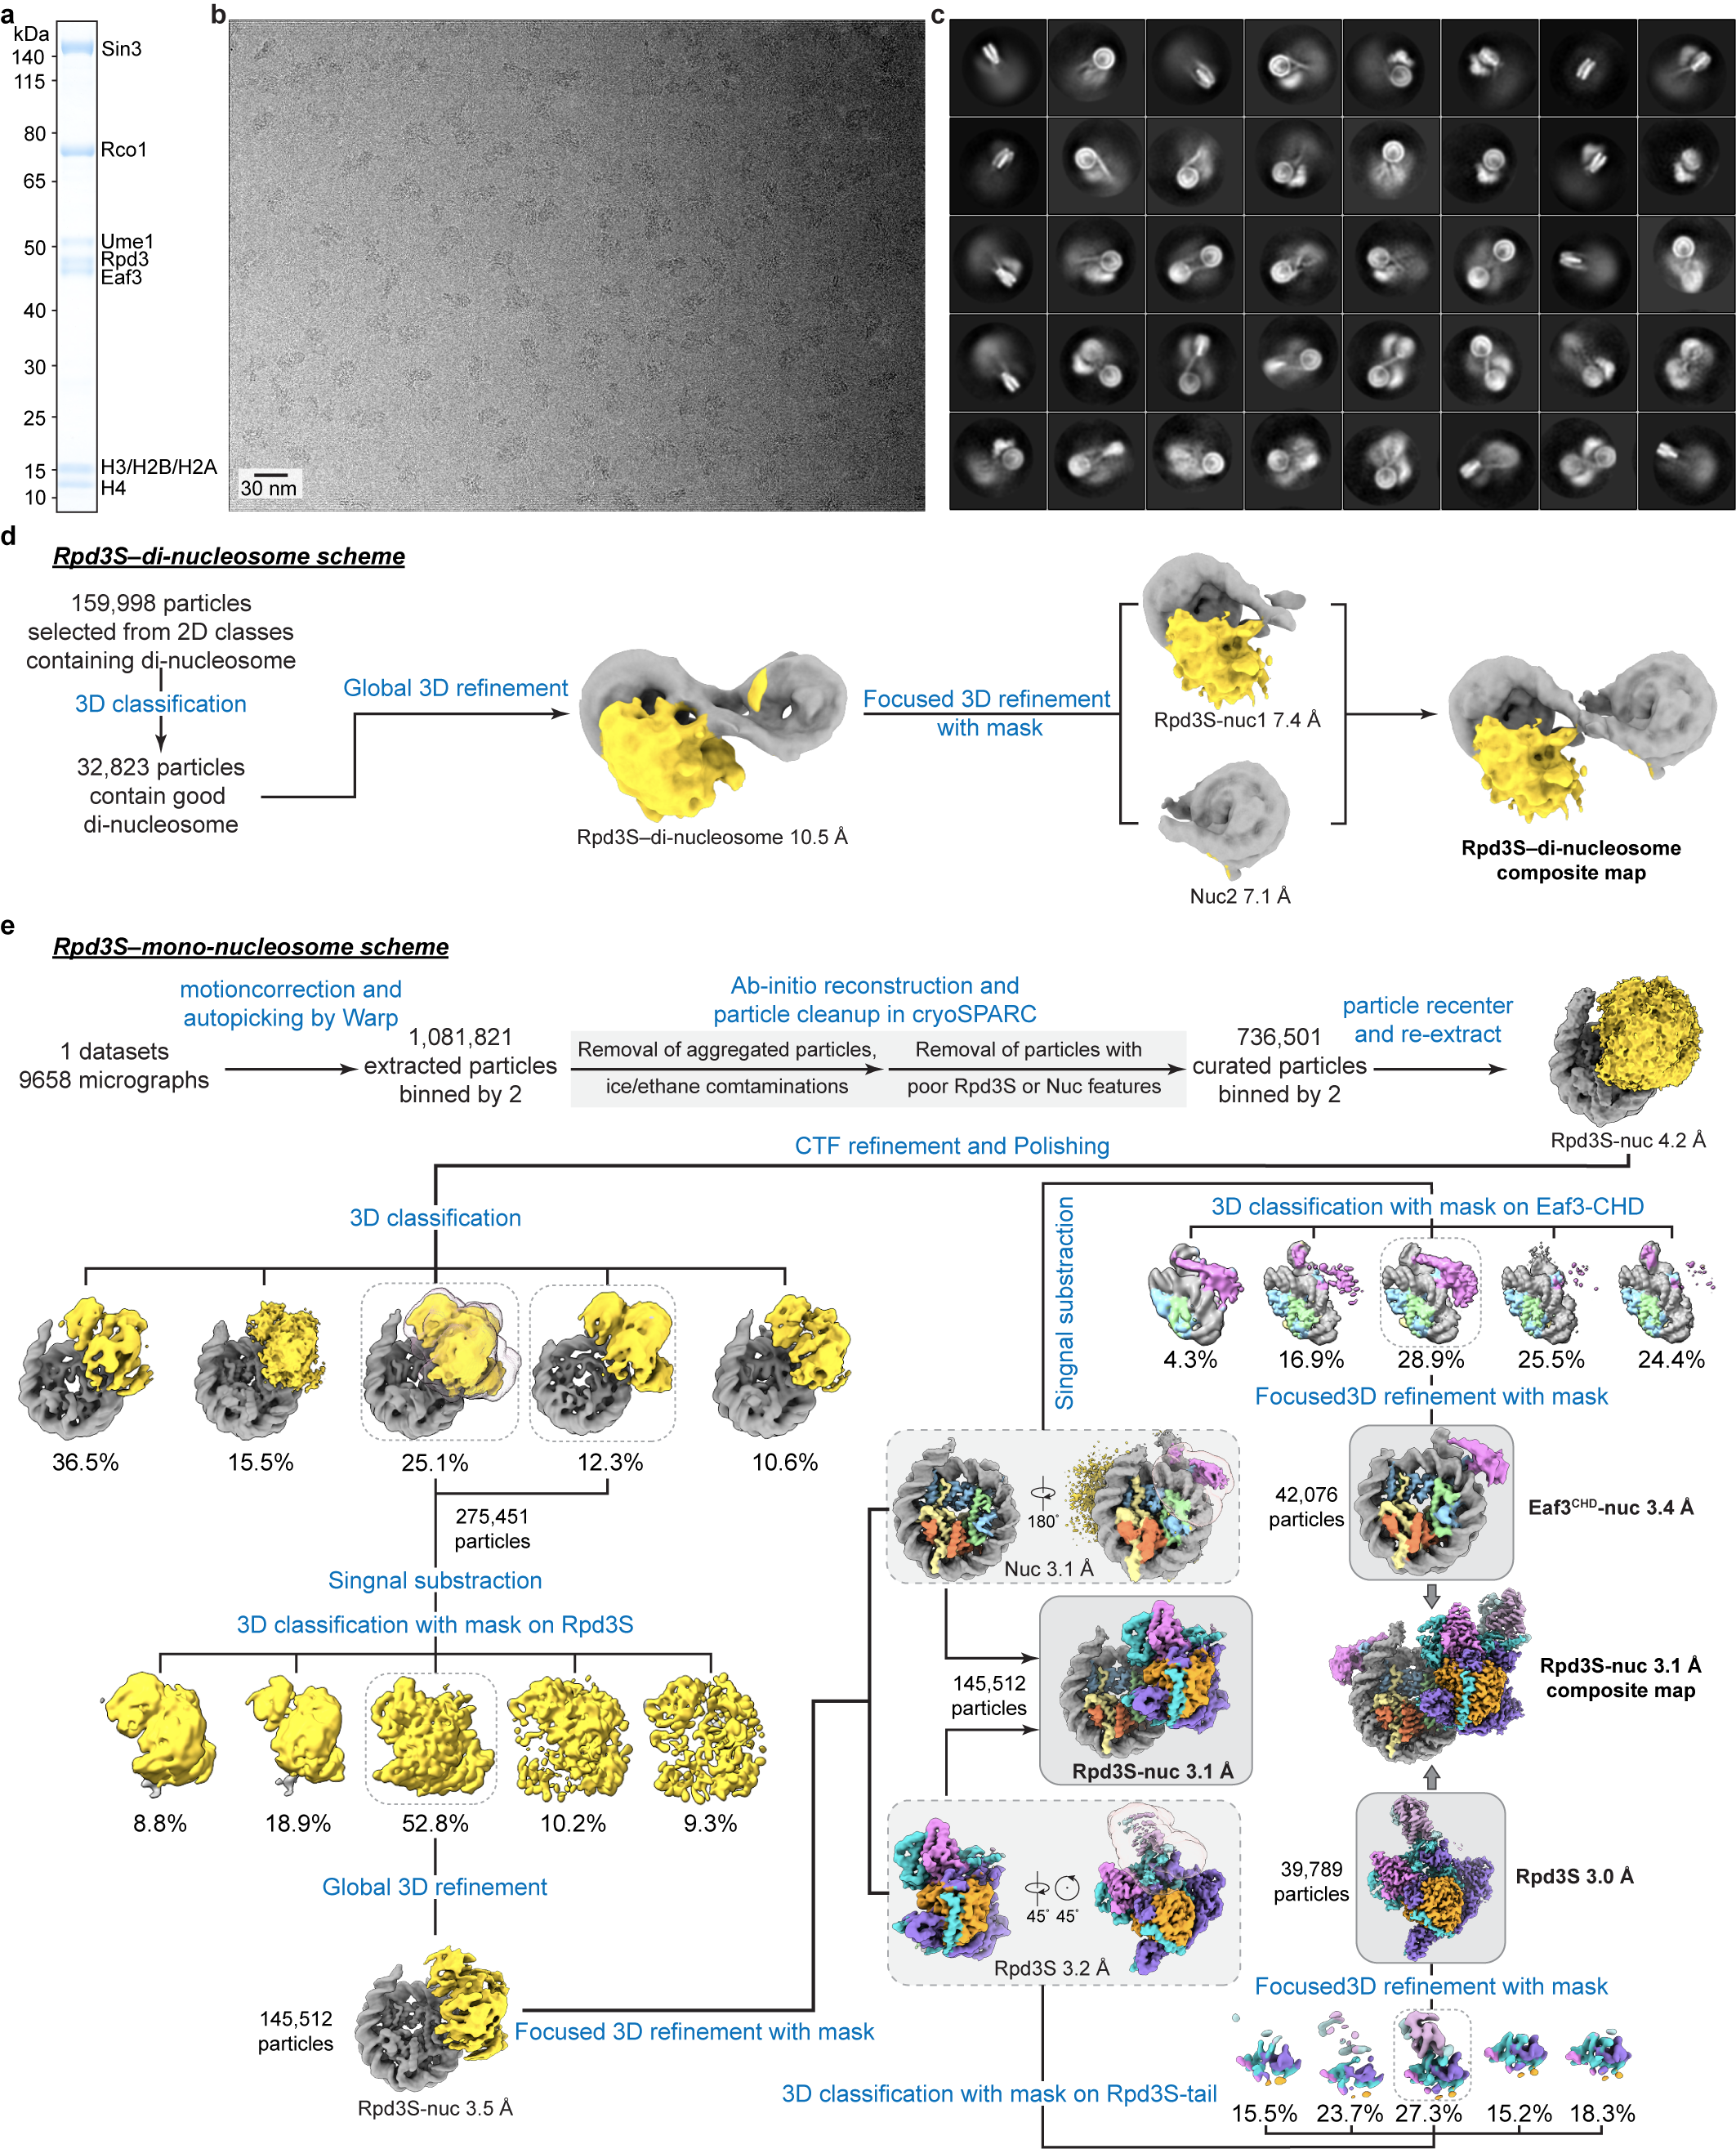
**

**Extended Data Figure 1 | Cryo-EM structure determination of Rpd3S-nucleosome complex.**


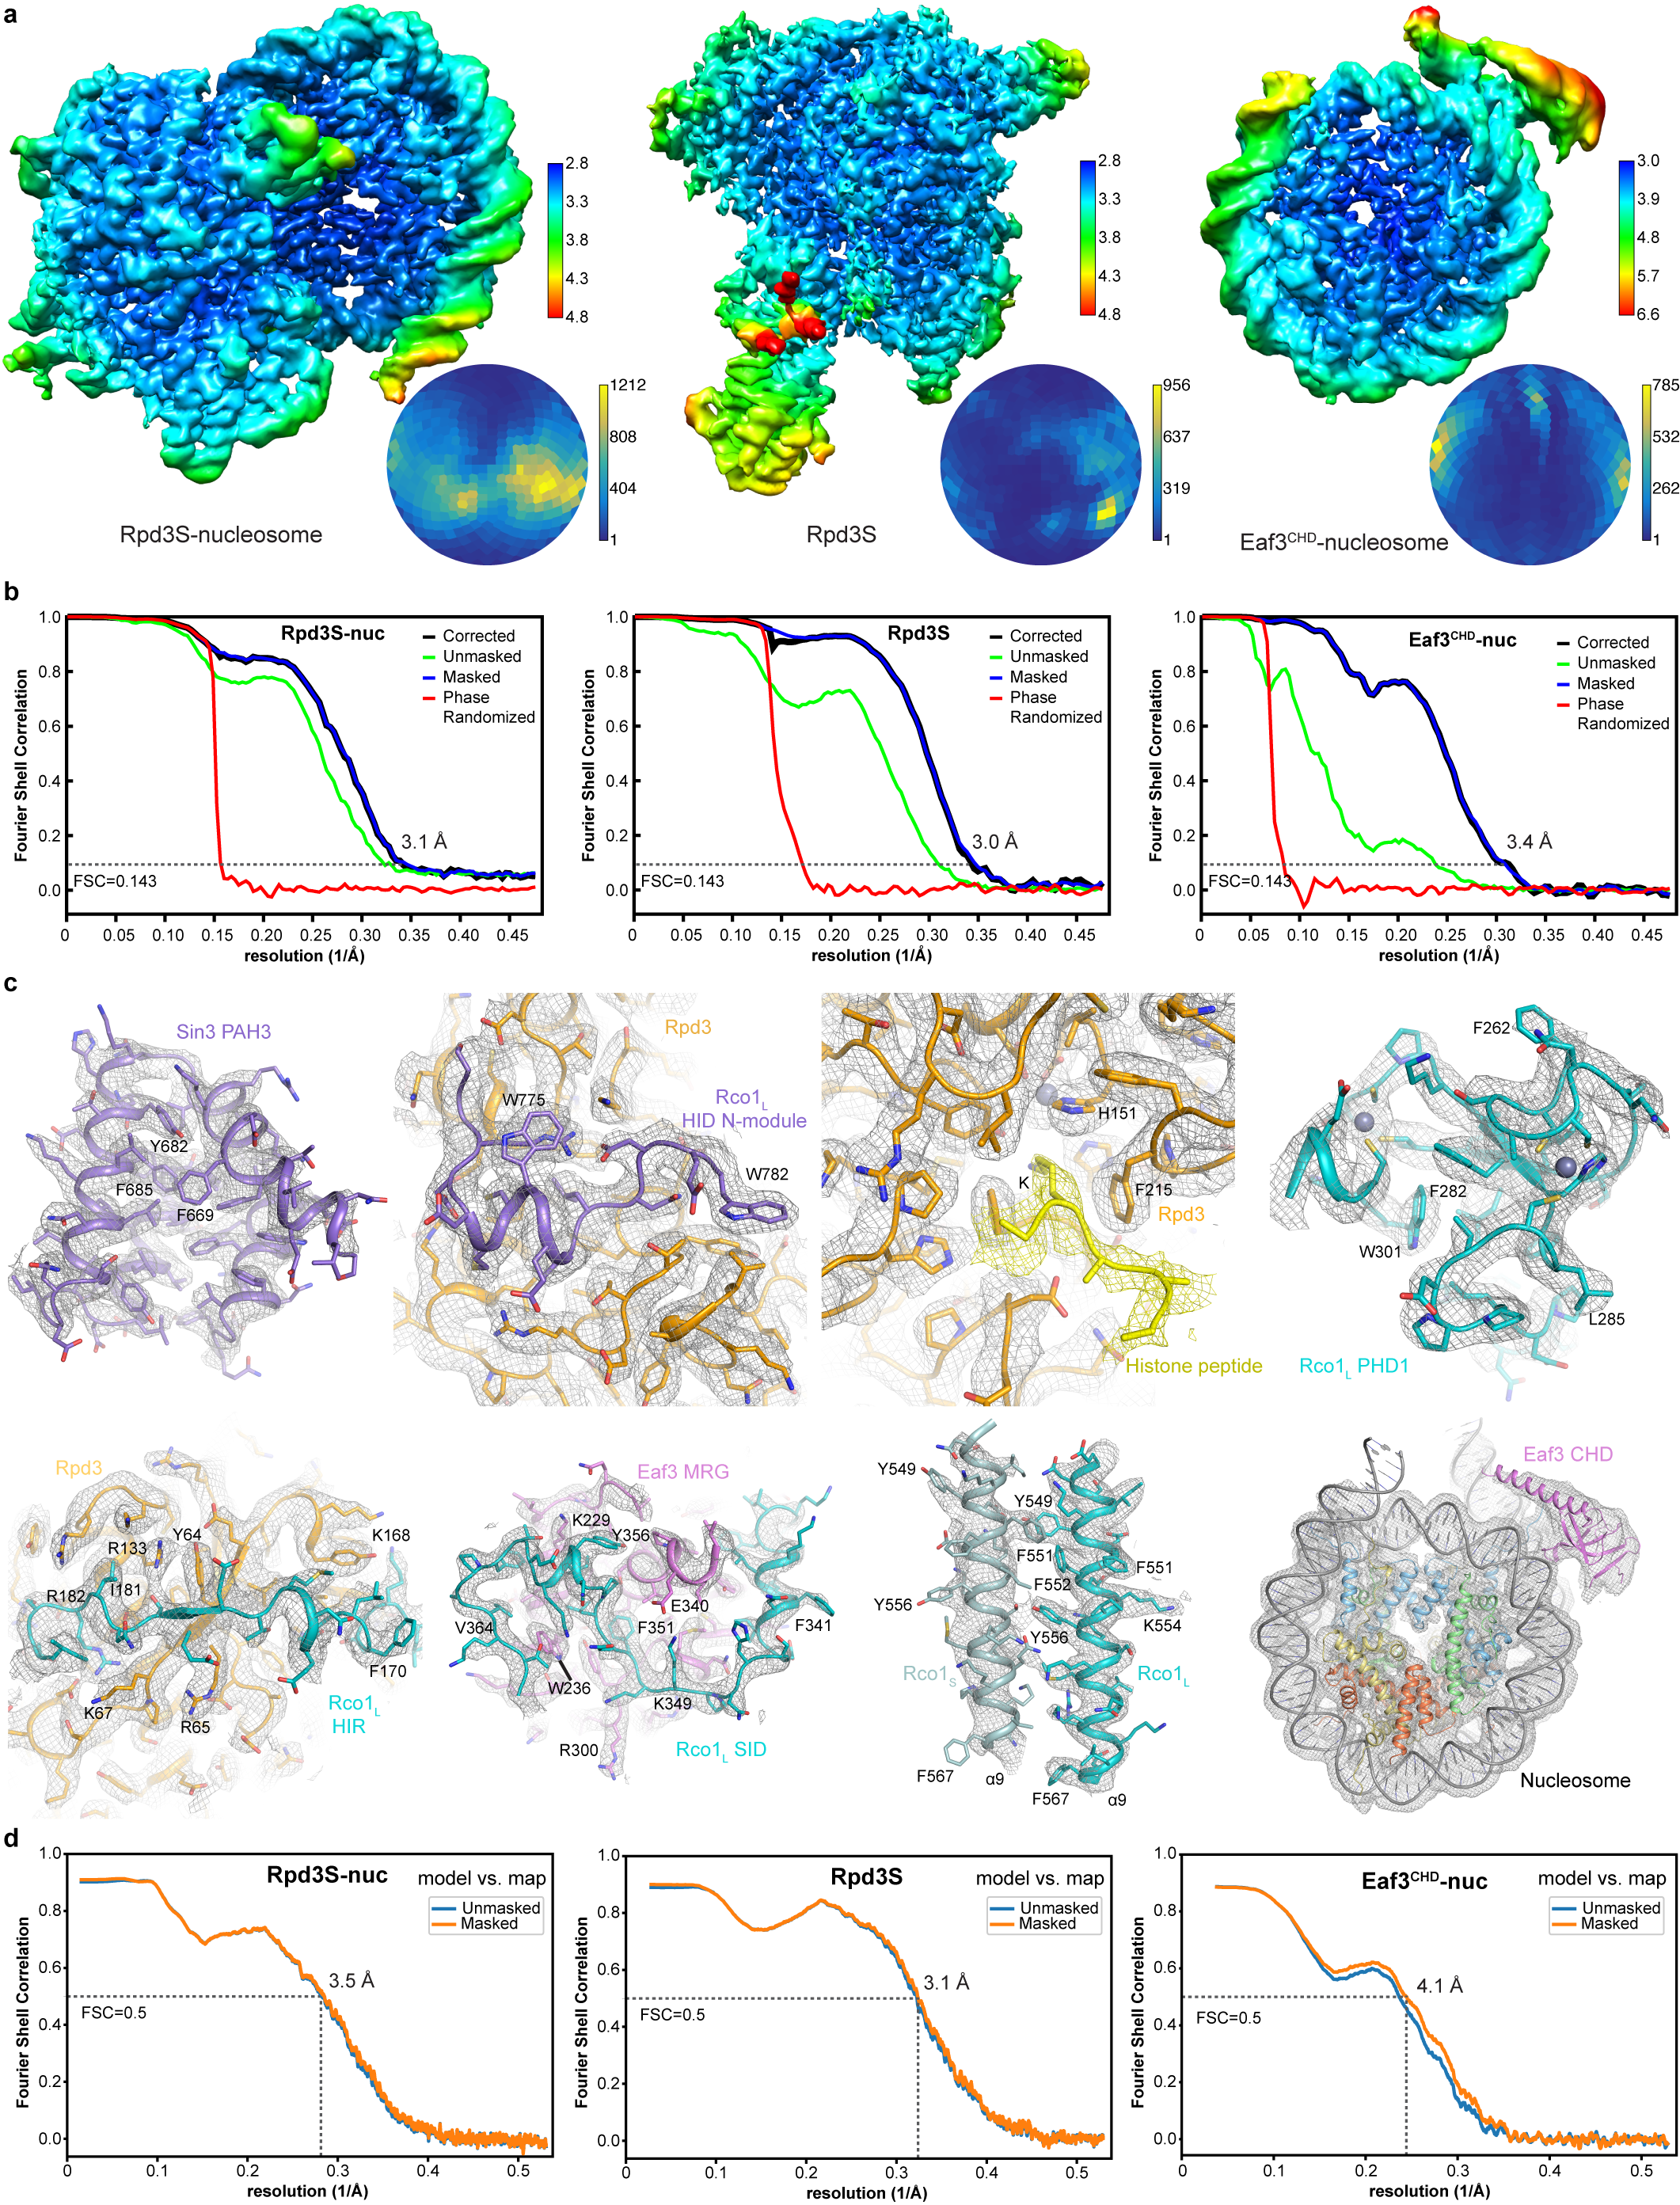


**Extended Data Figure 2 | Quality of cryo-EM reconstructions.**

**
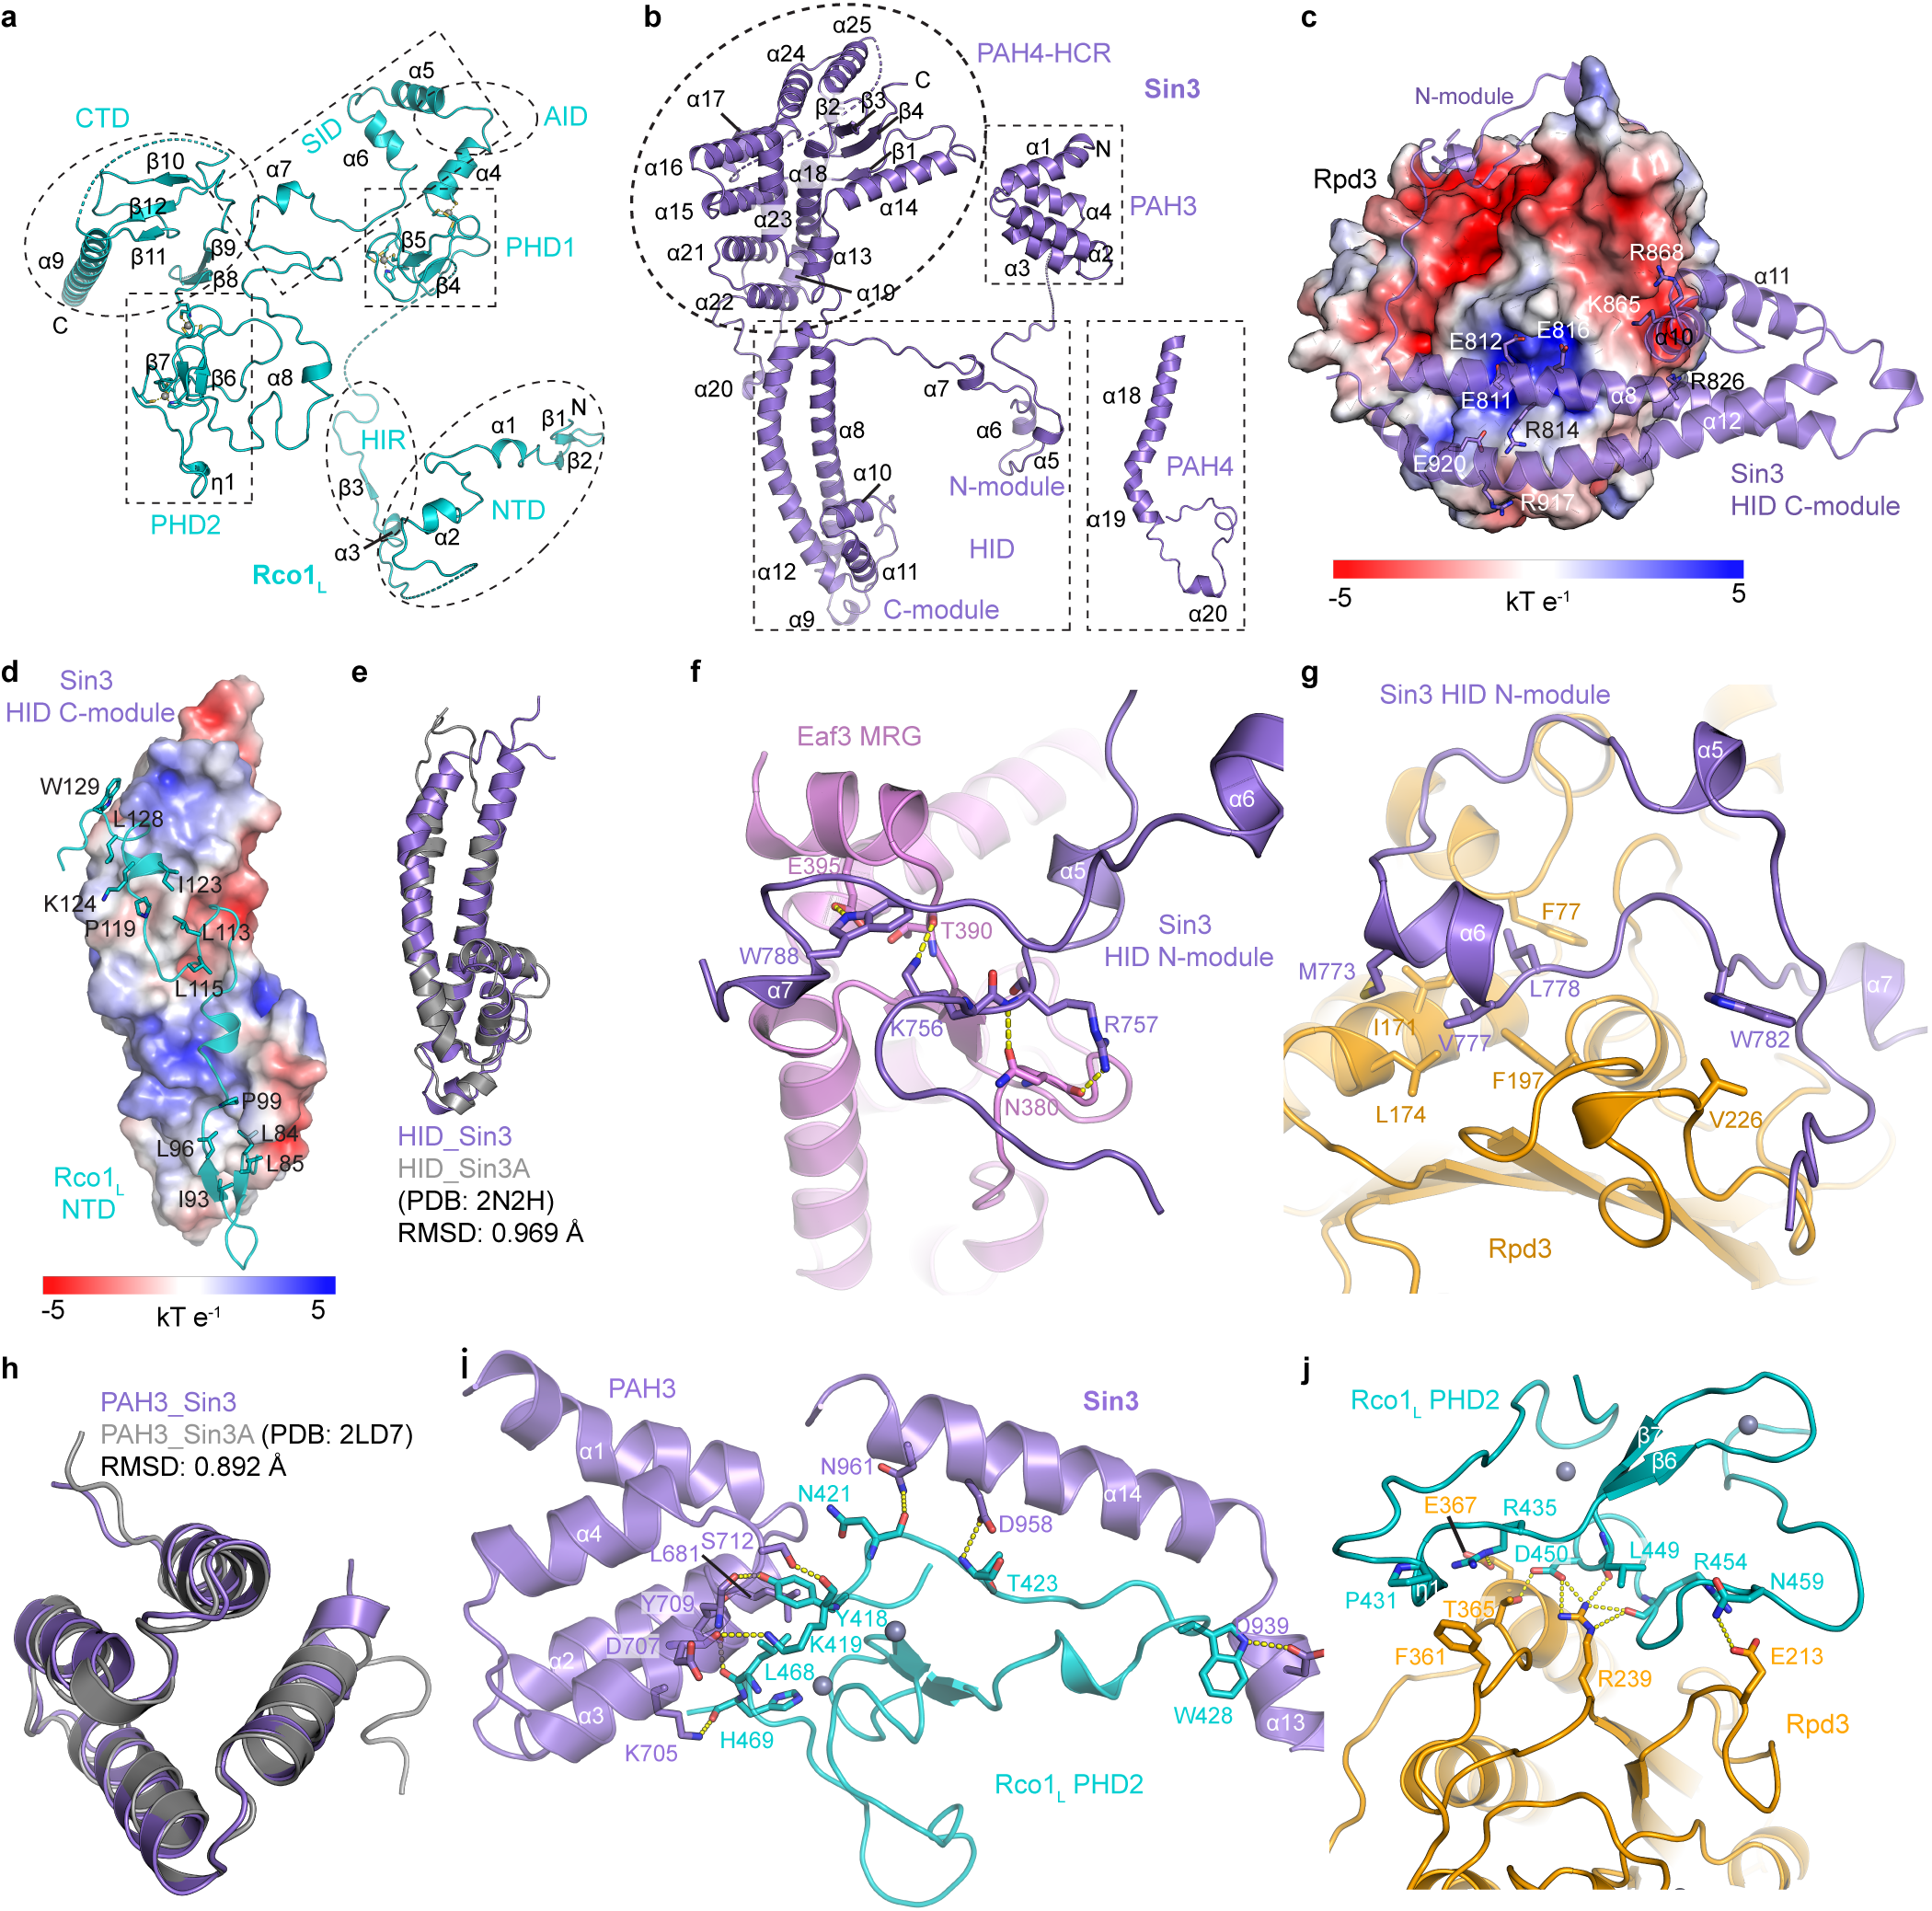
**

**Extended Data Figure 3 | Subunit domain structures and their inter-molecular interactions.**


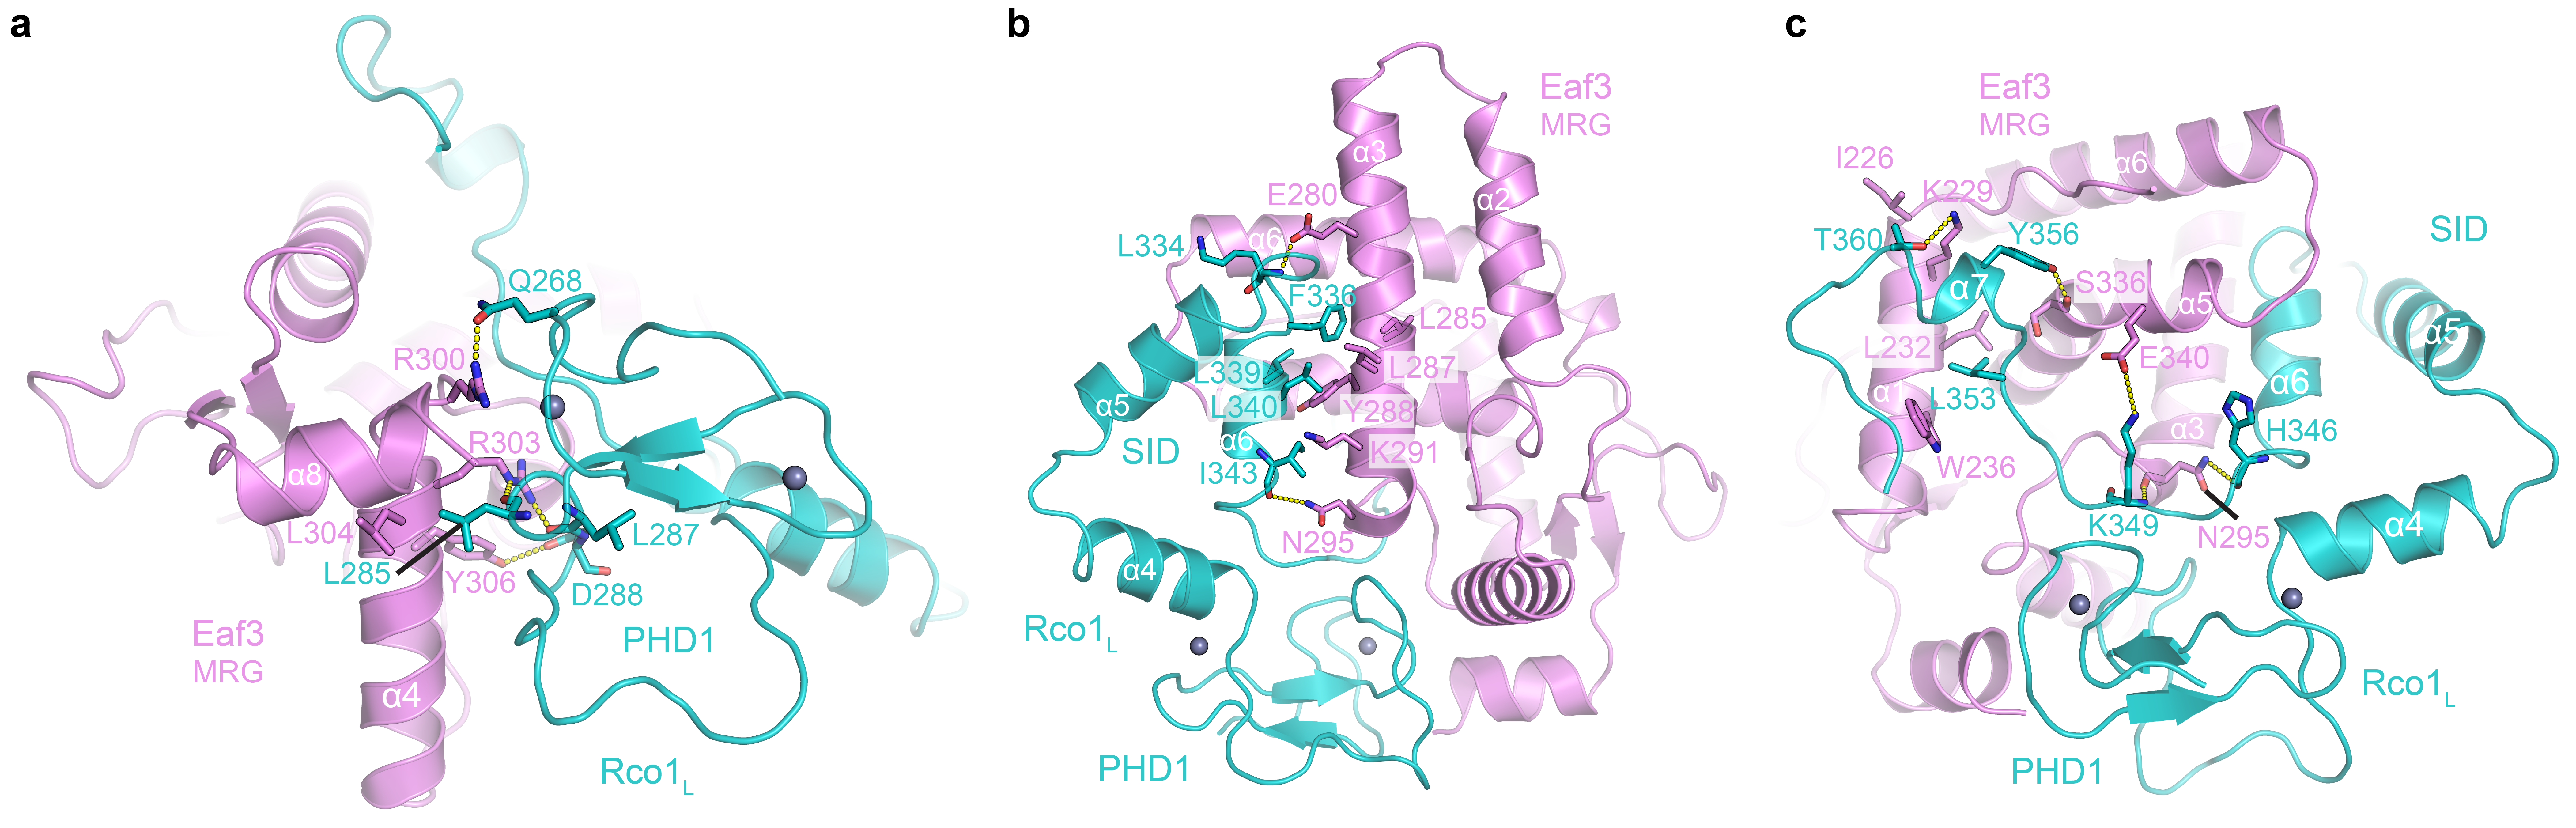


**Extended Data Figure 4 | Detailed interactions between the MRG domain of Eaf3 and Rco1L.**


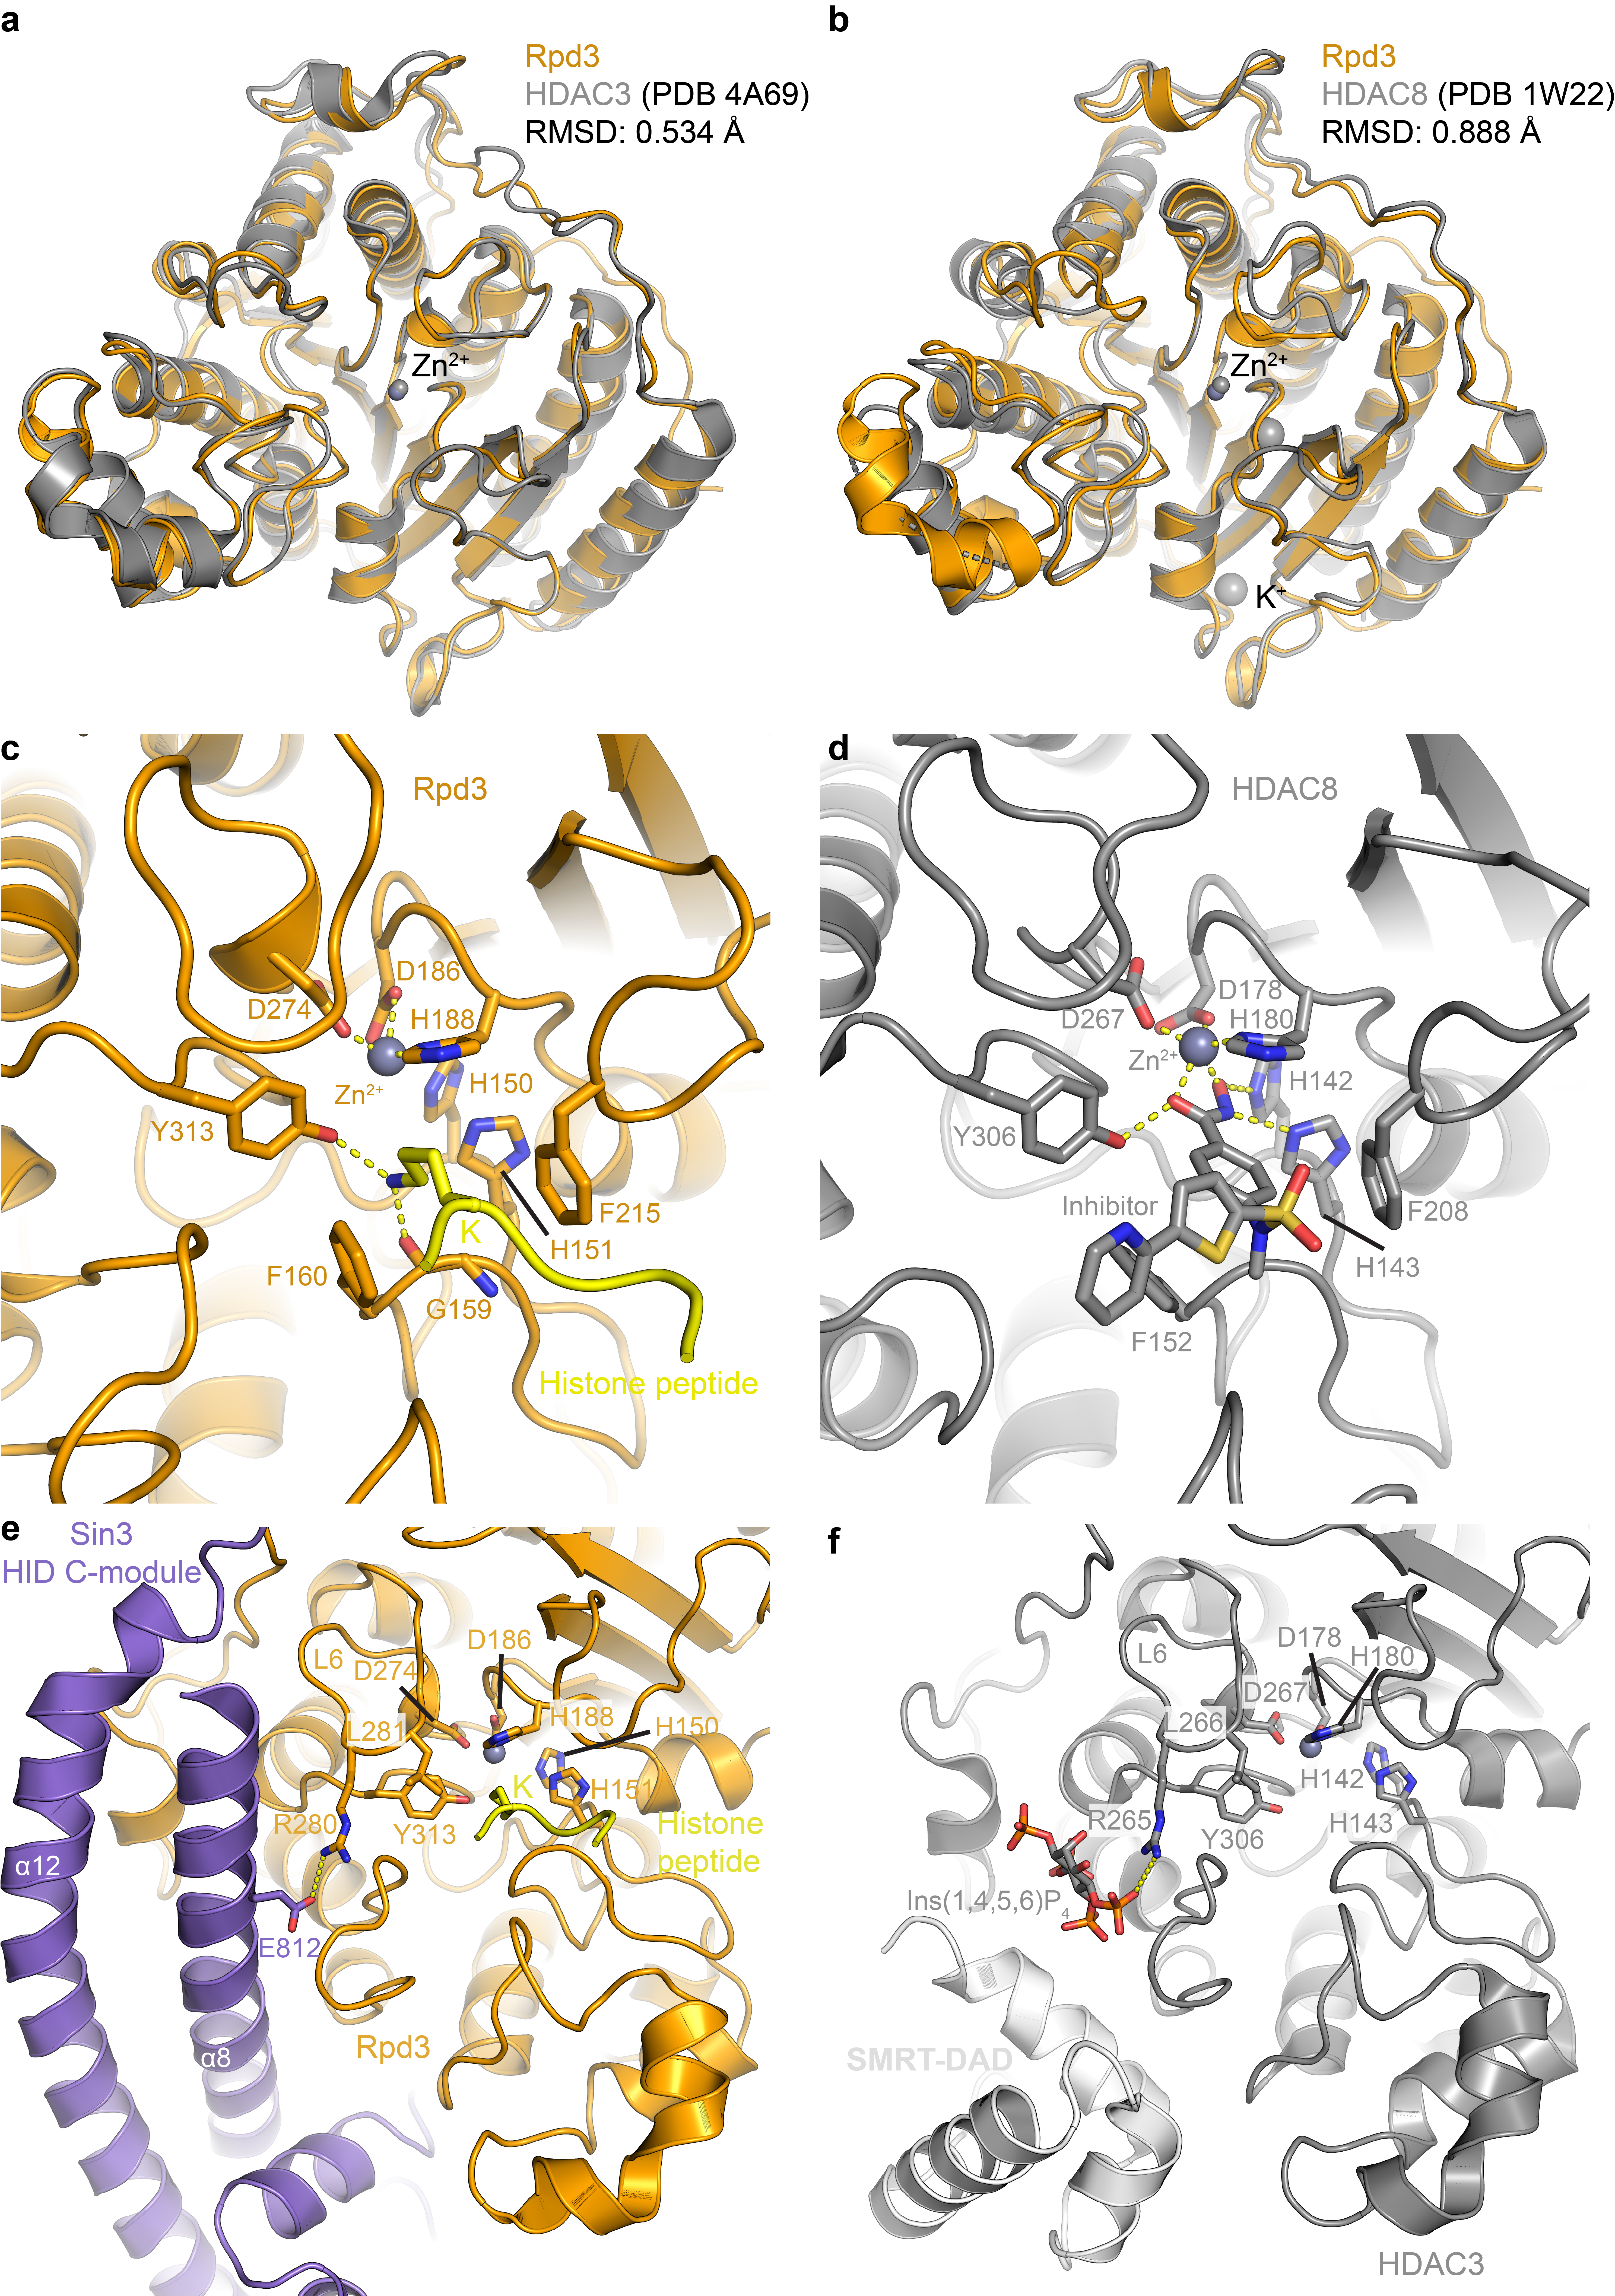


**Extended Data Figure 5 | Structural comparison between Rpd3 and HDACs.**
